# Supplementary material for: Impaired cecal motility and secretion alongside expansion of gut-associated lymphoid tissue in the Nlgn3R451C mouse model of autism
Source: PubMed Central journal article supplement (PMC10403596; doi:10.1038/s41598-023-39555-y), 2023-08-04
Supplement: 41598_2023_39555_MOESM2_ESM.pdf [file 41598_2023_39555_MOESM2_ESM.pdf]

## **Impaired cecal motility and secretion alongside expansion of gut-associated lymphoid tissue in the Nlgn3<sup>R451C</sup> mouse model of autism**

Short title: Cecal dysfunction in Nlgn3<sup>R451C</sup> mice

Chalystha Yie Qin Lee<sup>1</sup>, Gayathri K. Balasuriya<sup>2</sup>, Madushani Herath<sup>3, 4, 5</sup>, Ashley E. Franks<sup>6</sup>, Elisa L. Hill-Yardin<sup>1, 5\*</sup>

<sup>1</sup> School of Health and Biomedical Sciences, RMIT University, Bundoora, VIC, Australia;

<sup>2</sup> Graduate School of Medicine, Kobe University, Kobe, Japan;

<sup>3</sup> Department of Pathology and Immunology, Baylor College of Medicine, Houston, TX, United States;

<sup>4</sup> Texas Children's Microbiome Center, Department of Pathology, Texas Children's Hospital, Houston, TX, United States;

<sup>5</sup> Department of Physiology, University of Melbourne, Parkville, VIC, Australia;

<sup>6</sup> School of Life Sciences, La Trobe University, Bundoora, VIC, Australia.

\*Corresponding author.

### Correspondence

Elisa Hill-Yardin, School of Health and Biomedical Sciences, RMIT University, Building 223, Bundoora West Campus, 225-245 Clements Drive, Bundoora VIC 3083 Australia, elisa.hill@rmit.edu.au, +61 4 3405 2127

# Supplementary Figure 1

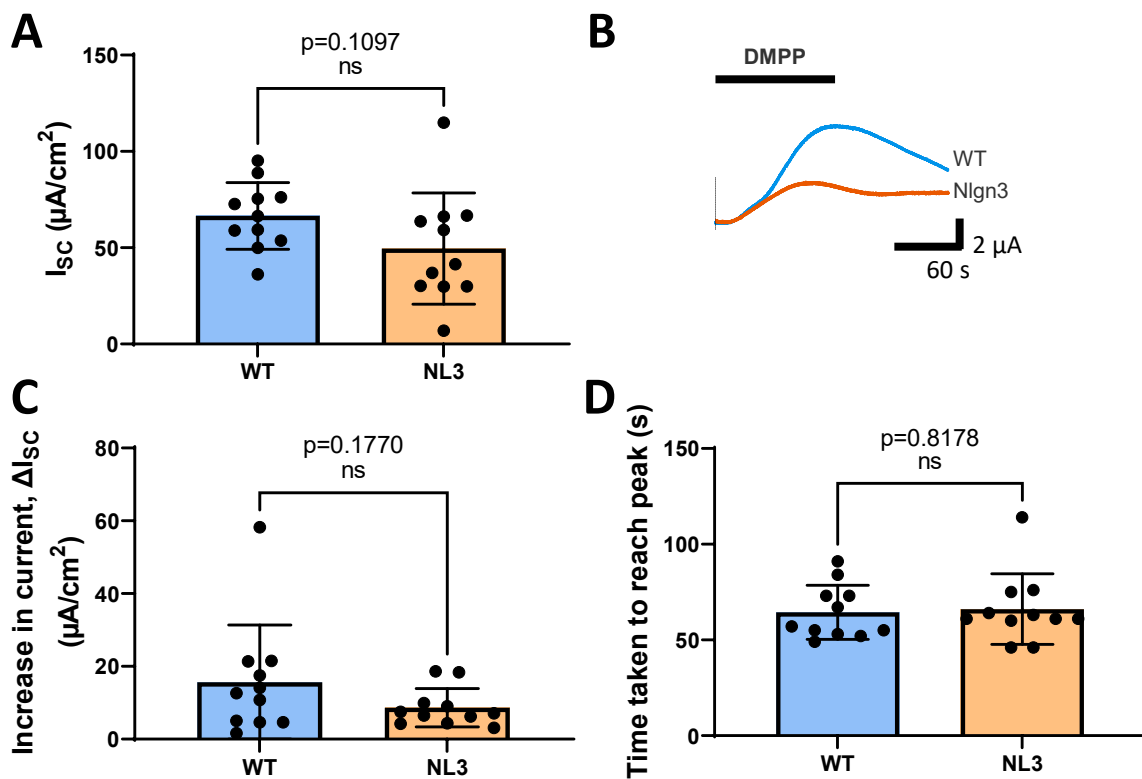

**Supplementary Figure 1:** Short-circuit current,  $I_{SC}$ , response to 10  $\mu$ M DMPP. A: The  $I_{SC}$  at baseline is not significantly different in Nlgn3<sup>R451C</sup> compared to WT. B: Representative current traces versus time of increase in  $I_{SC}$  in WT (blue) and Nlgn3 (orange). C: The increase in current,  $\Delta I_{SC}$  and D: time taken to reach the peak of the trace is not altered in the cecum of Nlgn3 mice compared to WT mice. Statistical comparisons were conducted using Student's unpaired *t*-test. Individual data and mean  $\pm$  SD were plotted for *n* = 11 mice in each group. ns = *p* >0.05.

## Supplementary video 1

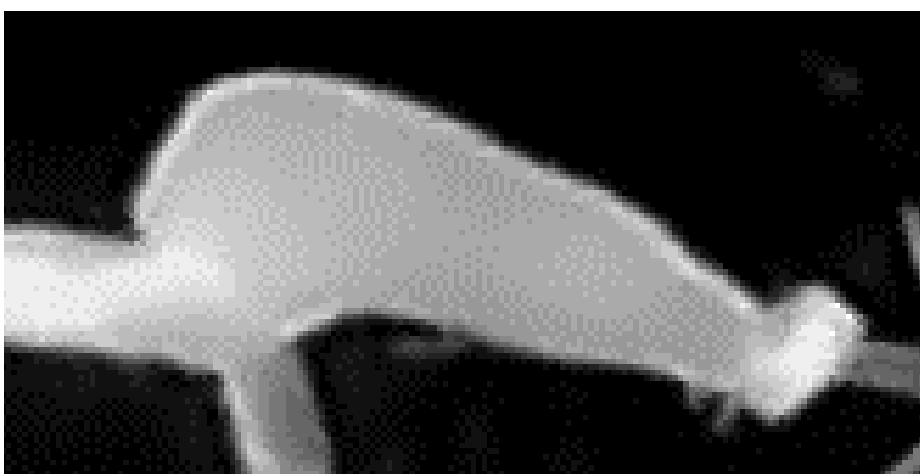

**Supplementary Video 1:** A real-time video recording of contractions in the cecum.

Supplementary Table 1: Concentrations of primary and secondary antibody steps.

|                    |             | Caecal patch cross-section | Myenteric plexus        |               |                         | Submucosal plexus       |            |               |
|--------------------|-------------|----------------------------|-------------------------|---------------|-------------------------|-------------------------|------------|---------------|
| Primary antibody   | Antibody    | CD11c-647                  | Hu                      | NOS           | Iba1                    | Hu                      | VIP        | ChAT          |
|                    | Host        | Armenian Hamster           | Human                   | Sheep         | Rabbit                  | Human                   | Rabbit     | Goat          |
|                    | Dilution    | 1:500                      | 1:5000                  | 1:1000        | 1:400                   | 1:5000                  | 1:100      | 1:100         |
|                    | Source      | Biologend                  | Mayo Clinic *           | Sigma-Aldrich | Fujifilm Wako           | Mayo Clinic *           | Immunostar | Sigma-Aldrich |
|                    | Cat. No.    | 117314                     | -                       | AB1529        | 019-19741               | -                       | 20077      | ab144P        |
| Secondary antibody | Target      | -                          | Human                   | Sheep         | Rabbit                  | Human                   | Rabbit     | Sheep         |
|                    | Fluorophore |                            | 594                     | 488           | 647                     | 594                     | 488        | 647           |
|                    | Host        |                            | Donkey                  | Donkey        | Donkey                  | Donkey                  | Donkey     | Donkey        |
|                    | Dilution    |                            | 1:750                   | 1:400         | 1:400                   | 1:750                   | 1:400      | 1:400         |
|                    | Source      |                            | Jackson Immuno Research | Invitrogen    | Jackson Immuno Research | Jackson Immuno Research | Invitrogen | Invitrogen    |
|                    | Cat. No.    |                            | 709-585-149             | A11015        | 711-605-152             | 709-585-149             | 2289872    | A21448        |

\*Hu antibodies were a gift from Dr. Vanda Lennon, Mayo Clinic, Rochester, MN.

Supplementary Table 2: Analysis of CaEMCs including forward/pro-peristaltic and reverse/anti-peristaltic contraction parameters.

| Overall CaEMC parameters                     |                   |                    |         |                                           |              |
|----------------------------------------------|-------------------|--------------------|---------|-------------------------------------------|--------------|
| Parameters                                   | WT<br>(mean ± SD) | NL3<br>(mean ± SD) | p-value | Benjamini-Hochberg<br>Adjusted<br>p-value | Significance |
| No. of CaEMC in 15min                        | 17.45 ± 3.42      | 24.09 ± 6.41       | 0.0103  | 0.0283                                    | *            |
| CaEMC velocity (mm/s)                        | 1.475 ± 0.578     | 2.200 ± 0.884      | 0.037   | 0.0678                                    | NS           |
| CaEMC duration (s)                           | 20.77 ± 8.10      | 11.59 ± 5.15       | 0.0048  | 0.0211                                    | *            |
| CaEMC quiescence period (s)                  | 25.21 ± 6.83      | 26.21 ± 6.95       | 0.7363  | 0.8099                                    | NS           |
| Percentage of F-R CaEMC (%)                  | 78.11 ± 9.06      | 55.73 ± 13.2       | 0.0001  | 0.0022                                    | **           |
| Caecal-colonic contraction interval (s)      | 19.61 ± 7.47      | 8.476 ± 3.54       | 0.0002  | 0.0022                                    | **           |
| Forward / Pro-peristaltic Contractions (FC)  |                   |                    |         |                                           |              |
| FC velocity (mm/s)                           | 4.125 ± 1.01      | 6.995 ± 3.64       | 0.0202  | 0.0494                                    | *            |
| FC duration (s)                              | 3.795 ± 1.06      | 2.119 ± 0.852      | 0.0006  | 0.0044                                    | **           |
| FC Start position (%)                        | 92.17 ± 5.63      | 81.17 ± 8.81       | 0.0023  | 0.0127                                    | **           |
| Reverse / Anti-peristaltic Contractions (RC) |                   |                    |         |                                           |              |
| RC velocity (mm/s)                           | 7.94 ± 1.72       | 9.82 ± 4.21        | 0.1857  | 0.2724                                    | NS           |
| RC duration (s)                              | 1.89 ± 0.386      | 1.37 ± 0.443       | 0.0082  | 0.0301                                    | *            |

Supplementary Table 3: Analysis of caecal content and mucus content.

| Caecal content                                      |                   |                    |         |              |
|-----------------------------------------------------|-------------------|--------------------|---------|--------------|
| Parameters                                          | WT<br>(mean ± SD) | NL3<br>(mean ± SD) | p-value | Significance |
| Caecal weight (before clearing) (g)                 | 0.5564 ± 0.0776   | 0.4717 ± 0.0766    | 0.0101  | *            |
| Weight of content (g)                               | 0.3921 ± 0.0728   | 0.3175 ± 0.0605    | 0.0096  | **           |
| Weight of content/Body weight                       | 0.01410 ± 0.00265 | 0.01214 ± 0.00204  | 0.0484  | *            |
| Mucus content                                       |                   |                    |         |              |
| Mucus Area ( $\mu\text{m}^2/\mu\text{m}^2$ )        | 0.1023 ± 0.0605   | 0.07409 ± 0.0462   | 0.2564  | NS           |
| Overall Caecal Area ( $\times 10^8 \mu\text{m}^2$ ) | 1.208 ± 0.403     | 1.127 ± 0.159      | 0.5592  | NS           |



Supplementary Table 4: Analysis of Ussing chamber parameters and response to DMPP.

| Overall Ussing chamber parameters                                            |                   |                    |         |              |
|------------------------------------------------------------------------------|-------------------|--------------------|---------|--------------|
| Parameters                                                                   | WT<br>(mean ± SD) | NL3<br>(mean ± SD) | p-value | Significance |
| Transepithelial resistance (TER)<br>( $\times 10^3 \Omega/\text{cm}^2$ )     | 0.2306 ± 0.0729   | 0.2621 ± 0.102     | 0.1809  | NS           |
| TER after FITC ( $\times 10^3 \Omega/\text{cm}^2$ )                          | 0.4056 ± 0.0835   | 0.4828 ± 0.119     | 0.7630  | NS           |
| Concentration of FITC (ng/ml)                                                | 21.14 ± 25.6      | 23.94 ± 29.8       | 0.2518  | NS           |
| Apparent permeability, $P_{\text{app}}$<br>(ng/ml/min/ $\text{cm}^2$ )       | 2.758 ± 1.05      | 3.204 ± 0.498      | 0.2400  | NS           |
| Response to 10 $\mu\text{M}$ DMPP                                            |                   |                    |         |              |
| Short-circuit current, $I_{\text{sc}}$<br>( $\mu\text{A}/\text{cm}^2$ )      | 66.56 ± 17.3      | 49.57 ± 28.9       | 0.1097  | NS           |
| Increase in current, $\Delta I_{\text{sc}}$<br>( $\mu\text{A}/\text{cm}^2$ ) | 15.64 ± 15.7      | 8.636 ± 5.27       | 0.1770  | NS           |
| Time taken to reach peak (s)                                                 | 64.45 ± 14.1      | 66.09 ± 18.5       | 0.8178  | NS           |
| Response to 20 $\mu\text{M}$ DMPP                                            |                   |                    |         |              |
| Short-circuit current, $I_{\text{sc}}$<br>( $\mu\text{A}/\text{cm}^2$ )      | 47.53 ± 14.6      | 36.66 ± 24.9       | 0.2320  | NS           |
| Increase in current, $\Delta I_{\text{sc}}$<br>( $\mu\text{A}/\text{cm}^2$ ) | 29.78 ± 11.5      | 19.30 ± 9.69       | 0.0367  | *            |
| Time taken to reach peak (s)                                                 | 95.40 ± 14.2      | 88.20 ± 8.70       | 0.1892  | NS           |

Supplementary Table 5: Analysis of Hu, VIP, and ChAT-immunostained submucosal neurons.

| Submucosal Hu <sup>+</sup> neurons   |                   |                    |         |              |
|--------------------------------------|-------------------|--------------------|---------|--------------|
| Parameters                           | WT<br>(mean ± SD) | NL3<br>(mean ± SD) | p-value | Significance |
| Hu neurons per ganglion              | 8.500 ± 1.04      | 8.900 ± 1.26       | 0.6273  | NS           |
| Submucosal VIP <sup>+</sup> neurons  |                   |                    |         |              |
| VIP neurons per ganglion             | 4.200 ± 0.963     | 4.620 ± 1.61       | 0.6611  | NS           |
| VIP neurons per ganglion (%)         | 57.64 ± 4.77      | 52.31 ± 15.5       | 0.5337  | NS           |
| Submucosal ChAT <sup>+</sup> neurons |                   |                    |         |              |
| ChAT neurons per ganglion            | 0.2750 ± 0.150    | 0.6000 ± 0.442     | 0.2064  | NS           |
| ChAT neurons per ganglion (%)        | 3.160 ± 3.04      | 6.568 ± 6.31       | 0.3589  | NS           |

Supplementary Table 6: Analysis of caecal patch count, CD11c<sup>+</sup> cell morphology and Iba-1<sup>+</sup> cell morphology.

| Caecal patch count                                  |                    |                           |                          |         |              |
|-----------------------------------------------------|--------------------|---------------------------|--------------------------|---------|--------------|
| Parameters                                          | WT<br>(mean ± SD)  | NL3<br>(mean ± SD)        |                          | p-value | Significance |
| Caecal patch count (total)                          | 1.000 ± 0          | 1.438 ± 0.629             |                          | 0.0240  | *            |
| Caecal patch count (Main)                           | 1.067 ± 0.258      | 1.000 ± 0                 |                          | 0.8994  | NS           |
| Caecal patch count (ILF)                            | 0.2000 ± 0.561     | 0.467 ± 0.640             |                          | 0.2008  | NS           |
| Caecal patch CD11c <sup>+</sup> cell morphology     |                    |                           |                          |         |              |
|                                                     |                    | NL3 (Main)<br>(mean ± SD) | NL3 (ILF)<br>(mean ± SD) |         |              |
| Area (µm <sup>2</sup> )                             | 592.8 ± 194        | 543.6 ± 118               | 653.7 ± 146              | 0.5521  | NS           |
| Sphericity                                          | 0.6269 ±<br>0.0368 | 0.6329 ±<br>0.0512        | 0.5932 ±<br>0.0334       | 0.2962  | NS           |
| Volume (µm <sup>3</sup> )                           | 658.3 ± 281        | 584.7 ± 121               | 687.6 ± 173              | 0.7173  | NS           |
| Myenteric plexus Iba-1 <sup>+</sup> cell morphology |                    |                           |                          |         |              |
| Number of Iba-1 <sup>+</sup> cells                  | 111.2 ± 16.8       | 109.2 ± 34.9              |                          | 0.9108  | NS           |
| Area (µm <sup>2</sup> )                             | 2856 ± 665         | 2895 ± 232                |                          | 0.9051  | NS           |
| Sphericity                                          | 0.4579 ±<br>0.0522 | 0.4792 ± 0.0184           |                          | 0.4147  | NS           |
| Volume (µm <sup>3</sup> )                           | 4257 ± 1151        | 4694 ± 498.4              |                          | 0.4575  | NS           |
